# Supplementary material for: Socio-Economic Factors Associated with Ethnic Disparities in SARS-CoV-2 Infection and Hospitalization
Source: MDPI journal article supplement (doi:10.3390/ijerph20156521), 2023-08-04
Supplement: s1 [file s1]

**Table S1.** Standardized Cumulative Incidence Rate (SCIR) and Standardized Cumulative Hospitalization Rate (SCHR) for 100,000 inhabitants (European population 2013)

| VARIABLES                | SCIR    |             |       | SCHR    |             |       |
|--------------------------|---------|-------------|-------|---------|-------------|-------|
|                          | Italian | Non-Italian | Total | Italian | Non-Italian | Total |
| <b>Overall</b>           | 6539    | 5753        | -     | 353     | 421         | -     |
| <b>Sex</b>               |         |             |       |         |             |       |
| Male                     | 6630    | 5962        | -     | 449     | 492         | -     |
| Females                  | 6469    | 5593        | -     | 269     | 377         | -     |
|                          |         |             |       |         |             |       |
| <b>HDI</b>               |         |             |       |         |             |       |
| Very high                | -       | -           | 3136  | -       | -           | 160   |
| Italy                    | -       | -           | 6539  | -       | -           | 353   |
| High                     | -       | -           | 5803  | -       | -           | 419   |
| Medium                   | -       | -           | 6807  | -       | -           | 520   |
| Low                      | -       | -           | 5967  | -       | -           | 874   |
|                          |         |             |       |         |             |       |
| <b>Deprivation Index</b> |         |             |       |         |             |       |
| Quintile 1               | -       | -           | 5917  | -       | -           | 353   |
| Quintile 2               | -       | -           | 5997  | -       | -           | 312   |
| Quintile 3               | -       | -           | 6963  | -       | -           | 413   |
| Quintile 4               | -       | -           | 6933  | -       | -           | 412   |
| Quintile 5               | -       | -           | 6710  | -       | -           | 387   |
|                          |         |             |       |         |             |       |
| <b>Urban-Rural Index</b> |         |             |       |         |             |       |
| A-pole                   | -       | -           | 6783  | -       | -           | 398   |
| A1-urban                 | -       | -           | 7946  | -       | -           | 476   |
| A2-rural                 | -       | -           | 6828  | -       | -           | 363   |
| B2-rural                 | -       | -           | 5883  | -       | -           | 325   |
| C2-rural                 | -       | -           | 5543  | -       | -           | 299   |
|                          |         |             |       |         |             |       |
| <b>Country</b>           |         |             |       |         |             |       |
| Romania                  | -       | -           | 4545  | -       | -           | 239   |
| Albania                  | -       | -           | 7870  | -       | -           | 514   |
| Morocco                  | -       | -           | 7307  | -       | -           | 479   |
| Ukraine                  | -       | -           | 5329  | -       | -           | 354   |
| North Macedonia          | -       | -           | 4699  | -       | -           | 290   |
| Ecuador                  | -       | -           | 14327 | -       | -           | 1204  |
| Nigeria                  | -       | -           | 7098  | -       | -           | 1799  |
| Moldova (Republic of)    | -       | -           | 4790  | -       | -           | 319   |
| China                    | -       | -           | 3665  | -       | -           | 1077  |
| Philippines              | -       | -           | 3199  | -       | -           | 395   |
|                          |         |             |       |         |             |       |
| <b>Continents</b>        |         |             |       |         |             |       |
| America                  | -       | -           | 9373  | -       | -           | 681   |
| Africa                   | -       | -           | 6462  | -       | -           | 589   |
| Europa                   | -       | -           | 6446  | -       | -           | 352   |
| Asia                     | -       | -           | 3749  | -       | -           | 428   |
| Oceania                  | -       | -           | 2545  | -       | -           | 0     |
|                          |         |             |       |         |             |       |
